# Supplementary material for: Bacterial Community in Water and Air of Two Sub-Alpine Lakes in Taiwan
Source: PubMed Central journal article supplement (PMC6031399; doi:10.1264/jsme2.me17148), 2018-04-21
Supplement: 33_120_s1.pdf [file 33_120_s1.pdf]

## **Bacterial community in water and air of two sub-alpine lakes in Taiwan**

Kshitij Tandon<sup>1,2,3+</sup>, Shan-Hua Yang<sup>1+</sup>, Min-Tao Wan<sup>4</sup>, Chia-Chin Yang<sup>1</sup>, Bayanmunkh

Baatar<sup>1</sup>,

Chih-Yu Chiu<sup>1</sup>, Jeng-Wei Tsai<sup>5</sup>, Wen-Cheng Liu<sup>6</sup>, and Sen-Lin Tang<sup>1\*</sup>

<sup>1</sup>Biodiversity Research Center, Academia Sinica, Taipei 11529, Taiwan

<sup>2</sup>Bioinformatics Program, Institute of Information Science, Taiwan International Graduate Program, Academia Sinica, Taipei 11529, Taiwan

<sup>3</sup>Institute of Bioinformatics and Structural Biology, National Tsing Hua University, Hsinchu 30013, Taiwan

<sup>4</sup>EcoHealth Microbiology Laboratory, WanYu Co., Ltd., Chiayi 600, Taiwan

<sup>5</sup>China Medical University, Department of Biological Science and Technology, Taichung, Taiwan

<sup>6</sup>Department of Civil and Disaster Prevention Engineering, National United University, Miao-Li 36003, Taiwan

<sup>+</sup>These authors contributed equally to this work and shared co-first authorship.

<sup>\*</sup> Corresponding author email: [sltang@gate.sinica.edu.tw](mailto:sltang@gate.sinica.edu.tw)

**Running headline:** Bacteria in air and lake

Table S1. Sampling information and sample identifier.

| Location              | Sampling time | Date (2015) | P <sup>a</sup> | AT <sup>b</sup> | ST <sup>c</sup> | H <sup>d</sup> | Air sample | Lake sample | Wind speed (m/sec) | Rainfall (+/- 3h) | Lake Depth (Maximum depth) |
|-----------------------|---------------|-------------|----------------|-----------------|-----------------|----------------|------------|-------------|--------------------|-------------------|----------------------------|
| Tsuei-Feng Lake (TFL) | 1             | Jan. 14     | 817            | 16.5            | 10.9            | 78.9           | TA1        | TS1         | 0.746              | NO                | 4.7 m                      |
|                       | 2             | Jan. 29     | 817            | 9.8             | 10.6            | 95.0           | TA2        | TS2         | 0.634              | NO                |                            |
|                       | 3             | Feb. 13     | 817            | 14.0            | 9.0             | 49.6           | TA3        | TS3         | 1.11               | NO                |                            |
|                       | 4             | Feb. 26     | 820            | 20.8            | 14.0            | 55.1           | TA4        | TS4         | 0.24               | NO                |                            |
| Yuan-Yang Lake (YYL)  | 1             | Jan. 13     | 837            | 8.9             | 8.6             | 100.0          | YA1        | YS1         | 0.071              | NO                | 4.5 m                      |
|                       | 2             | Jan. 28     | 833            | 5.5             | 8.7             | 100.0          | YA2        | YS2         | 0.089              | NO                |                            |
|                       | 3             | Feb. 12     | 836            | 9.3             | 9.2             | 87.2           | YA3        | YS3         | 0.966              | NO                |                            |
|                       | 4             | Feb. 25     | 840            | 17.1            | 14.5            | 84.0           | YA4        | YS4         | 0.555              | NO                |                            |

<sup>a</sup>Air pressure (Bar)

<sup>b</sup>Air temperature (°C)

<sup>c</sup>Surface water temperature (°C)

<sup>d</sup>Humidity (%)

Table S2

**Diversity Analyses of Samples (Rarefied data)****a) Lake Surface water Samples (YS, TS)**

| SAMPLES | OTUS   | COVERAGE | CHAO1  | SHANNON | SIMPSON | ACE    | SHANNONEVEN | SIMPSONEVEN |
|---------|--------|----------|--------|---------|---------|--------|-------------|-------------|
| TS1     | 128    | 0.994    | 167.61 | 2.37    | 0.184   | 201.7  | 0.4896      | 0.0431      |
| TS2     | 68     | 0.663    | 103.25 | 1.40    | 0.151   | 152.9  | 0.3029      | 0.0288      |
| TS3     | 92.33  | 0.997    | 112.43 | 2.39    | 0.169   | 112.2  | 0.5335      | 0.0665      |
| TS4     | 98.66  | 0.996    | 134.65 | 2.33    | 0.158   | 164.3  | 0.5095      | 0.0646      |
| YS1     | 181.33 | 0.990    | 307.25 | 2.89    | 0.127   | 432    | 0.5559      | 0.0435      |
| YS2     | 182    | 0.990    | 297.21 | 2.62    | 0.149   | 363.3  | 0.5038      | 0.0403      |
| YS3     | 76     | 0.998    | 86.03  | 2.48    | 0.164   | 89.64  | 0.5791      | 0.0841      |
| YS4     | 132.33 | 0.993    | 234.84 | 2.82    | 0.089   | 311.27 | 0.5782      | 0.0848      |

**b) Air Samples**

| SAMPLES | OTUS | COVERAGE | CHAO1  | SHANNON | SIMPSON | ACE    | SHANNONEVEN | SIMPSONEVEN |
|---------|------|----------|--------|---------|---------|--------|-------------|-------------|
| TA1     | 6.33 | 0.999    | 6.5    | 0.78    | 0.557   | 5.750  | 0.469       | 0.4882      |
| TA2     | 8    | 0.669    | 6.5    | 1.27    | 0.306   | 6.183  | 0.620       | 0.7396      |
| TA3     | 6.5  | 0.999    | 13.5   | 1.10    | 0.391   | 25.433 | 0.362       | 0.5333      |
| TA4     | 5    | 0.999    | 13     | 1.28    | 0.335   | 22.169 | 0.451       | 0.6367      |
| YA1     | 4    | 0.999    | 12.667 | 1.21    | 0.353   | 21.583 | 0.441       | 0.6208      |
| YA2     | 8.33 | 0.999    | 6.666  | 1.39    | 0.276   | 2.333  | 0.545       | 0.7348      |
| YA3     | 4.66 | 0.999    | 6      | 1.18    | 0.353   | 4.333  | 0.496       | 0.6622      |
| YA4     | 7.33 | 0.999    | 6      | 0.99    | 0.425   | 4.148  | 0.415       | 0.5520      |

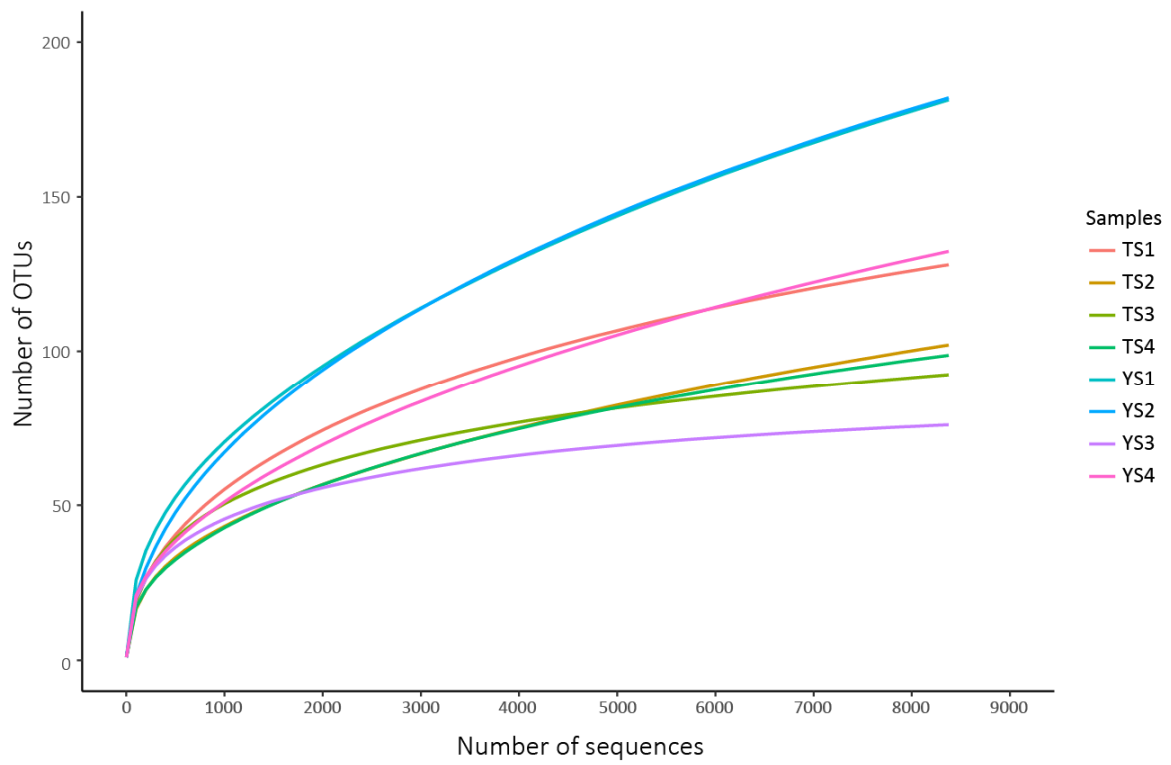

Figure S1. Rarefaction curves of bacterial OTUs in the surface water of the two lakes.

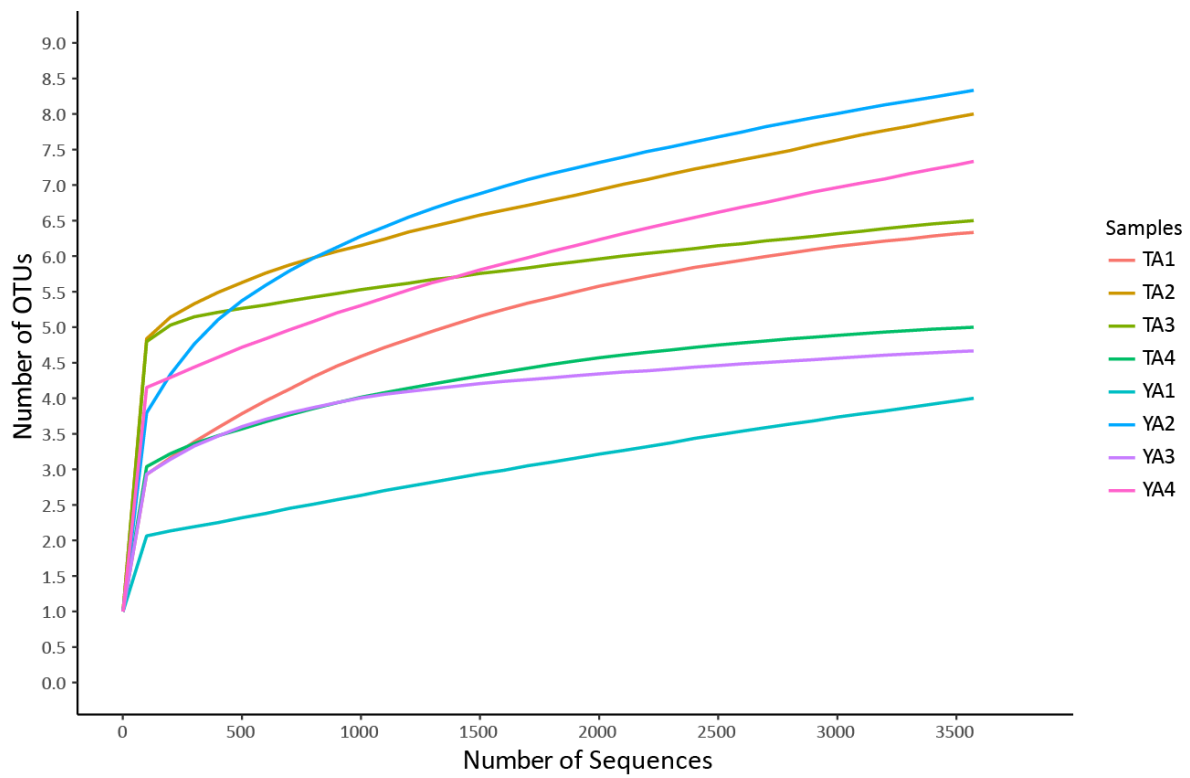

Figure S2. Rarefaction curves of bacterial OTUs in the air above the two lakes.

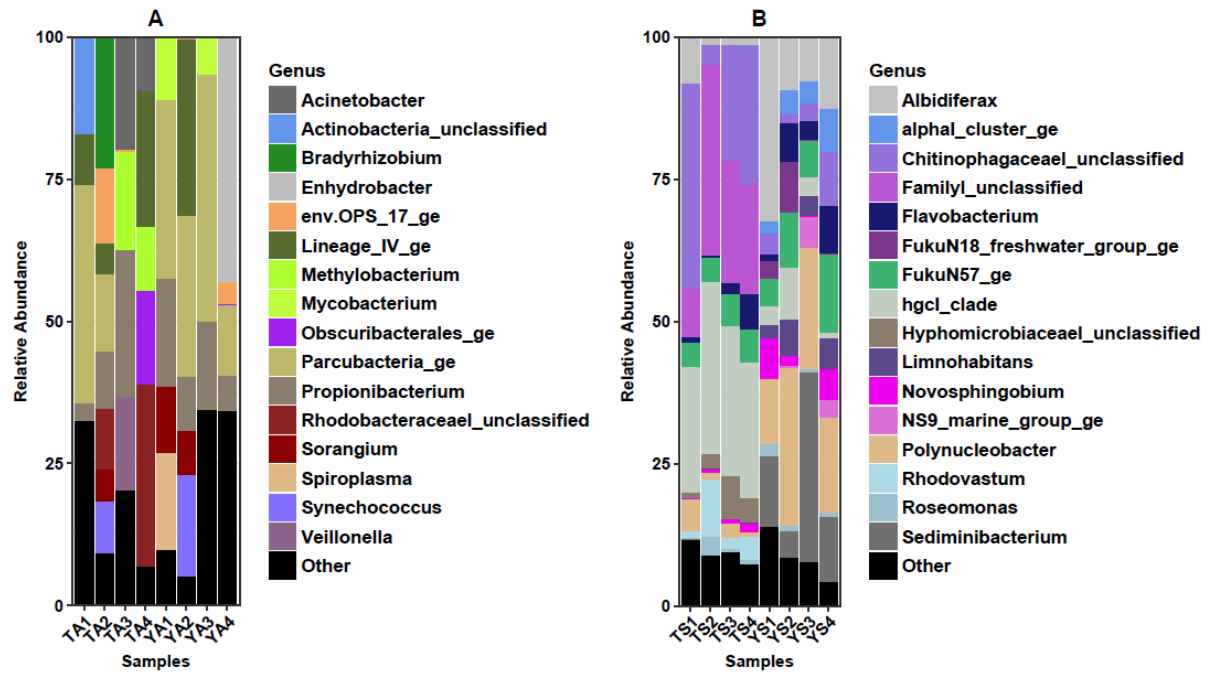

Fig S3. Bar plots for genus-level relative abundances for air and lake water samples. A) Relative abundances of the top 16 genera; *Parcubacteria* is the dominant group. B) Lake surface water samples relative abundances at the genus level. The two lakes had different compositions.

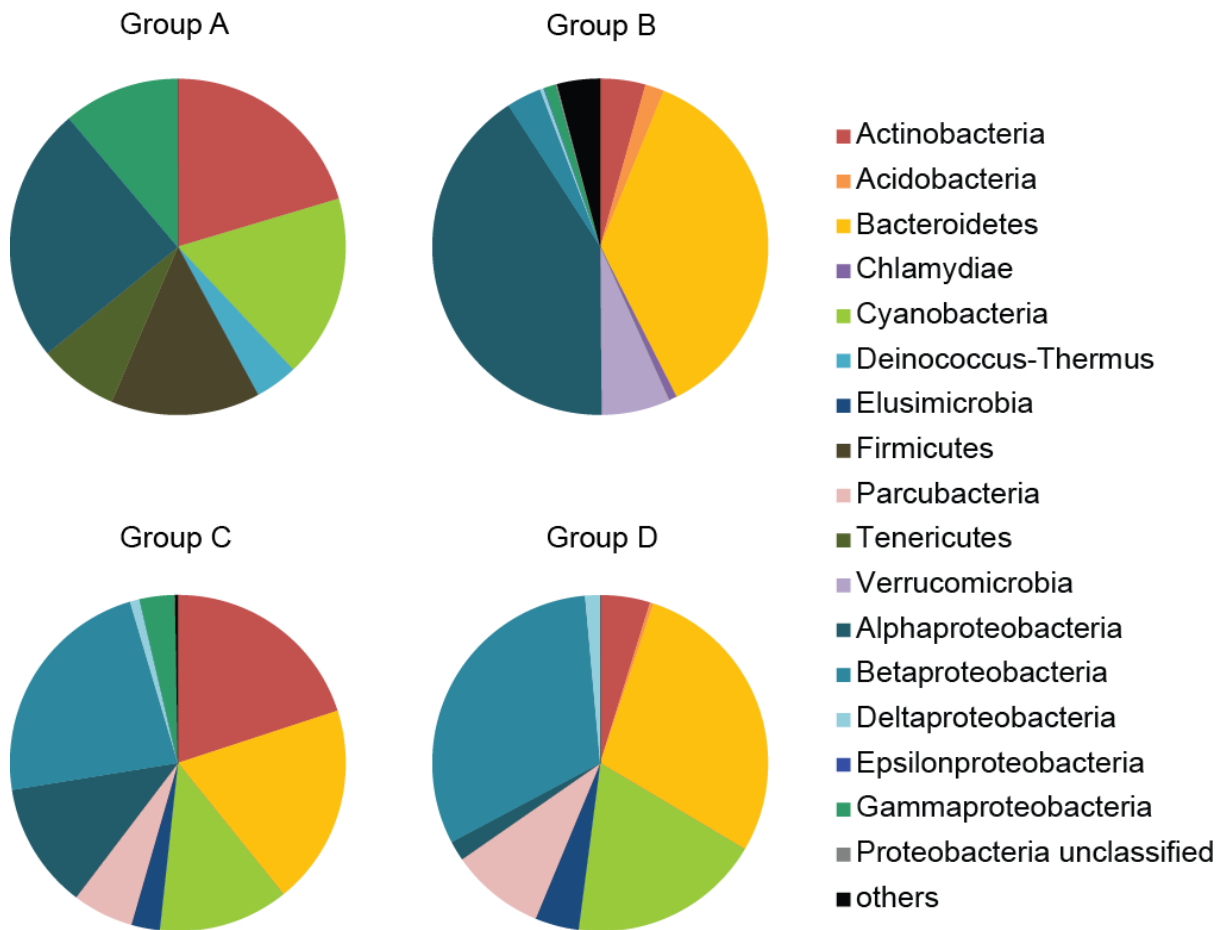

Figure S4. Pie charts of bacterial phylum and class levels (only for *Proteobacteria*) of the OTUs. Group A indicates 17 bacterial OTUs obtained only from the air above the two lakes (Group A in Figure 3); Group B indicates 596 bacterial OTUs obtained only from the lakes (Group B in Figure 3); Group C indicates 46 bacterial OTUs overlap in lakes and air samples (Group C in Figure 3); Group D indicates 18 bacterial OTUs that are shared among the four habitats (Group D in Figure 3). Colors represent different bacterial classes.

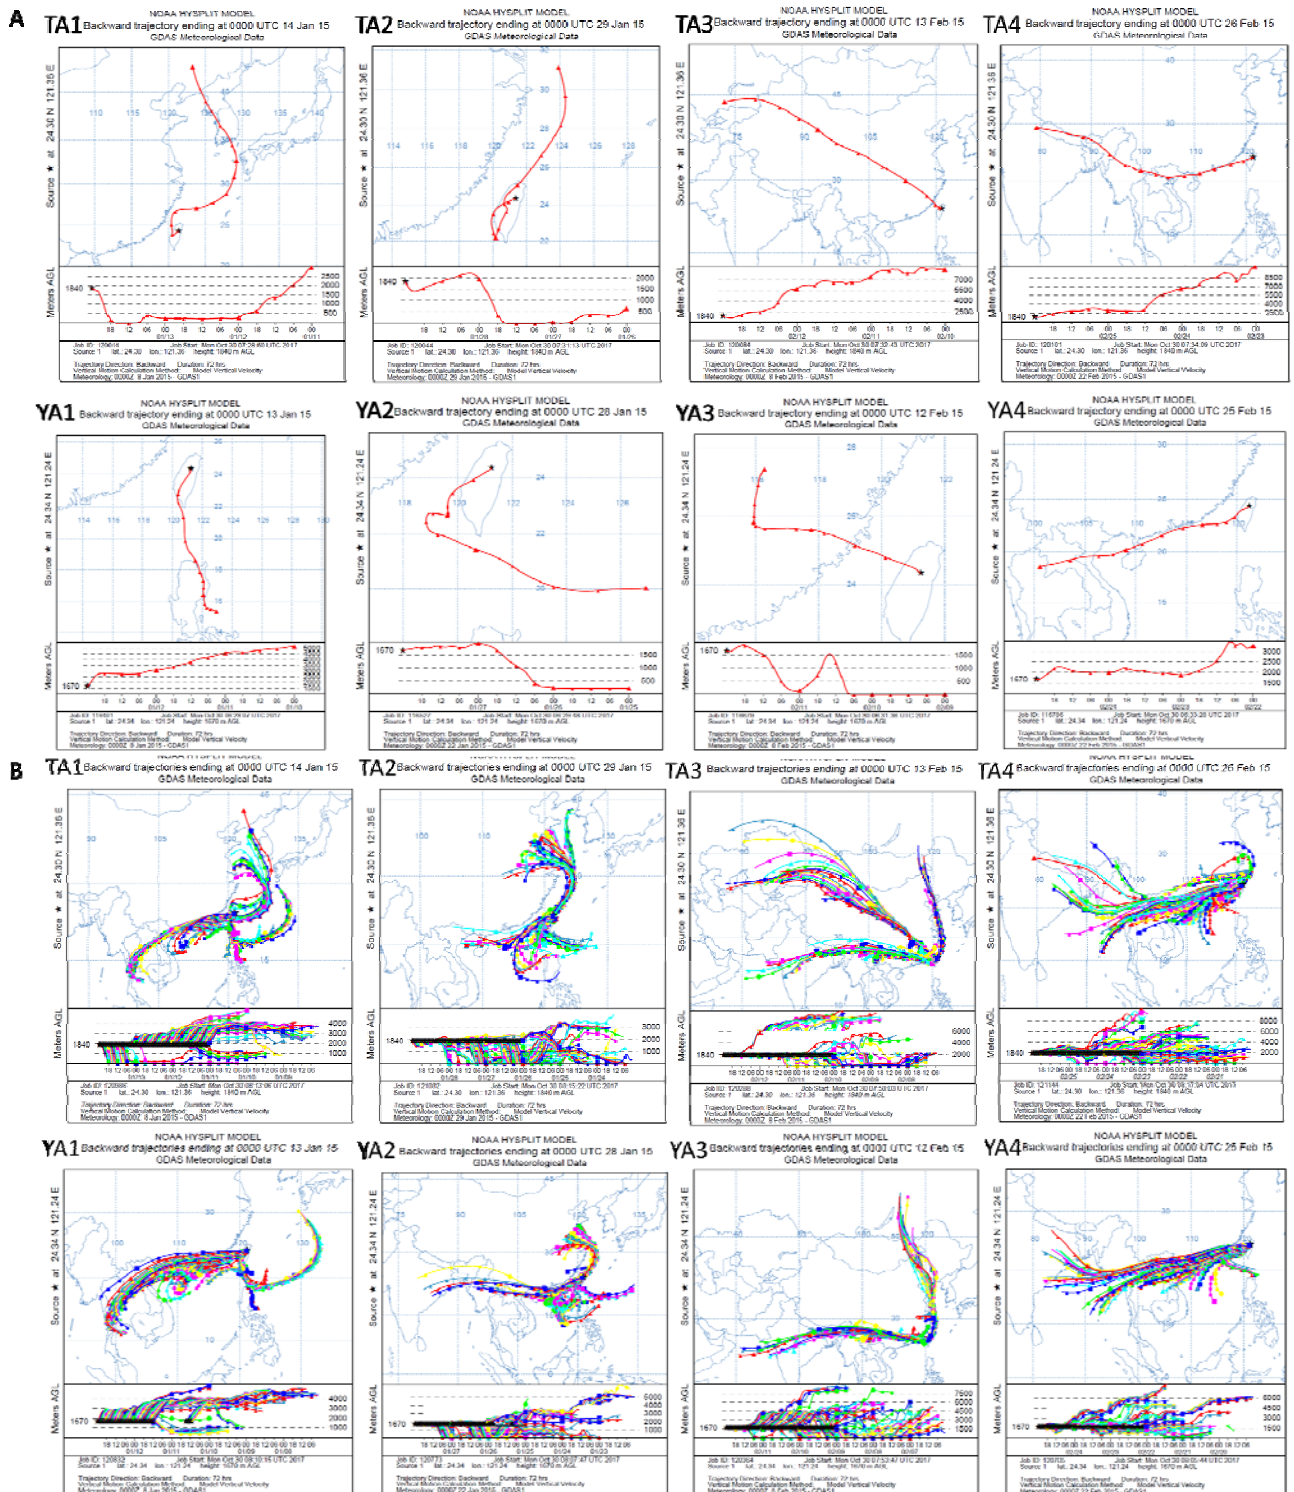

Figure S5. Backward trajectory simulations evaluated by HYSPLIT model for 72 h for each sampling time. TA1-TA4 are backward trajectories of sampling times 1-4 at Tsuei-Feng Lake; YA1-YA4 are backward trajectories of sampling times 1-4 at Yuan-Yang lake. A) Shows overall trajectory for 72 h and B)



shows air trajectories every 1 h for 72 h from the sampling day. Source of images: output of the public website service software HYSPLIT (<http://ready.arl.noaa.gov/HYSPLIT.php>).

### **Fasta Sequence OTU6**

>OTU6

```
CAGGGCTAGAAACCAAGCTGCATCCAACCCGAAAGGGATGGAGCCTTCGAGGGT
GCTTGGCAGGTGATGCATGGCTGTCGTCAGTTCGTGGCTTGAGCTGTTCCCTTCA
GTGGGGTAACGAACGCAACCCTCGTTGTCTGTAAATTTTTTCAGGCGAGACTGCT
CCCTCACGGGAGAGGAAGGTGGGGATGACGCCAAGTCAGCATGTCCCTTGATGC
CCTGGGCTGCACACGTGATAACAATGGGTGGTACAGAAGGACGCAATACGGTAAC
GTGGAGCAAATCCCAAAAACCACCCCAGTACGGATTGAGGTCTGCAACCGACC
TCATGAAGCCGGAATCGCTAGTAATCGTGGGTCAGCCATACCACGGTGAATACG
TTCTCGAGTCTT
```
